# Supplementary material for: Siamese Networks for Clinically Relevant Bacteria Classification Based on Raman Spectroscopy
Source: MDPI journal article supplement (doi:10.3390/molecules29051061), 2024-02-28
Supplement: s1 [file s1]

# Supplementary material

## Siamese Networks for Clinically Relevant Bacteria Classification based on Raman Spectroscopy

*Jhonatan Contreras<sup>1,2,‡</sup>, Sara Mostafapour<sup>1, ‡</sup>, Jürgen Popp<sup>1,2</sup> and Thomas Bocklitz<sup>1,2,3,\*</sup>*

<sup>1</sup> Institute of Physical Chemistry (IPC) and Abbe Center of Photonics (ACP), Friedrich Schiller University Jena, Member of the Leibniz Centre for Photonics in Infection Research (LPI), Helmholtzweg 4, 07743 Jena, Germany.

<sup>2</sup> Leibniz Institute of Photonic Technology, Member of Leibniz Health Technologies, Member of the Leibniz. Centre for Photonics in Infection Research (LPI), Albert Einstein Straße 9, 07745 Jena, Germany.

<sup>3</sup> Institute of Computer Science, Faculty of Mathematics, Physics & Computer Science, University Bayreuth Universitaetsstraße 30, 95447 Bayreuth, Germany

KEYWORDS: Siamese Networks; Machine learning; Bacteria Classification; Raman Spectroscopy.

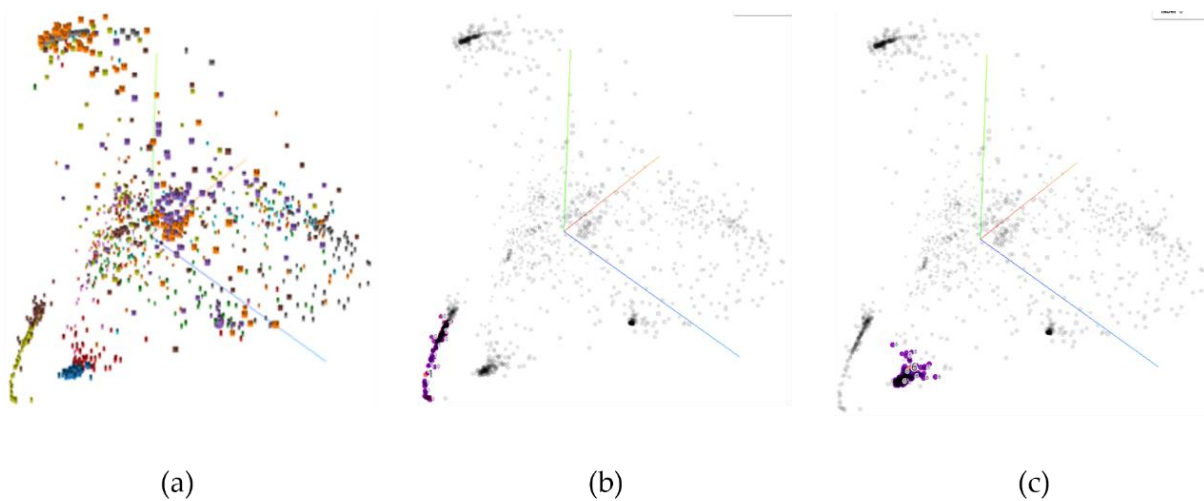

**Figure S1.** Pre-trained Embedding projections of three PCA components that capture only 52% of the variance in the testing data. (a) 15 classes clusters, (b)-(c) some of the clusters that are well separated from the other classes.

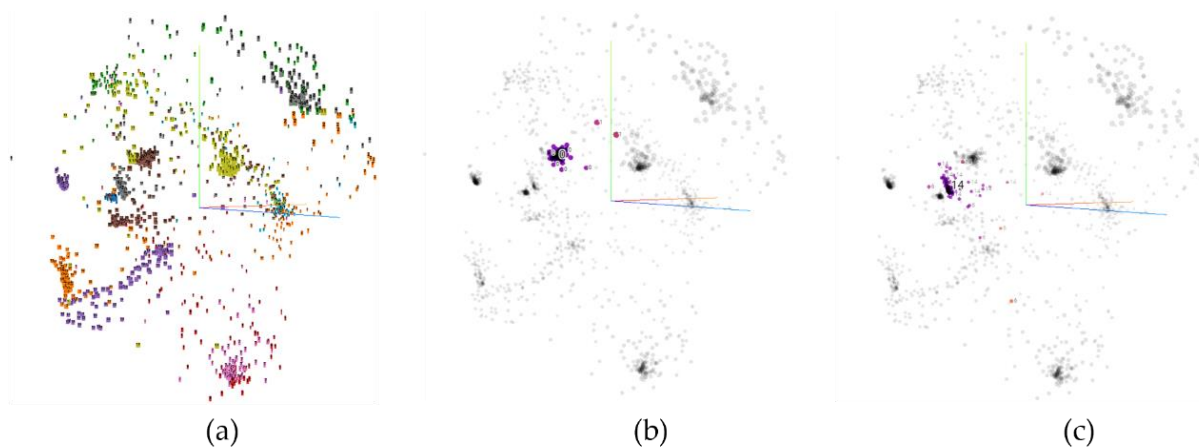

**Figure S2.** Fine-tuned Embedding projections of three PCA components that capture only 47% of the variance in the testing data. (a) 15 classes clusters, (b)-(c) some of the clusters that are well separated from the other classes.

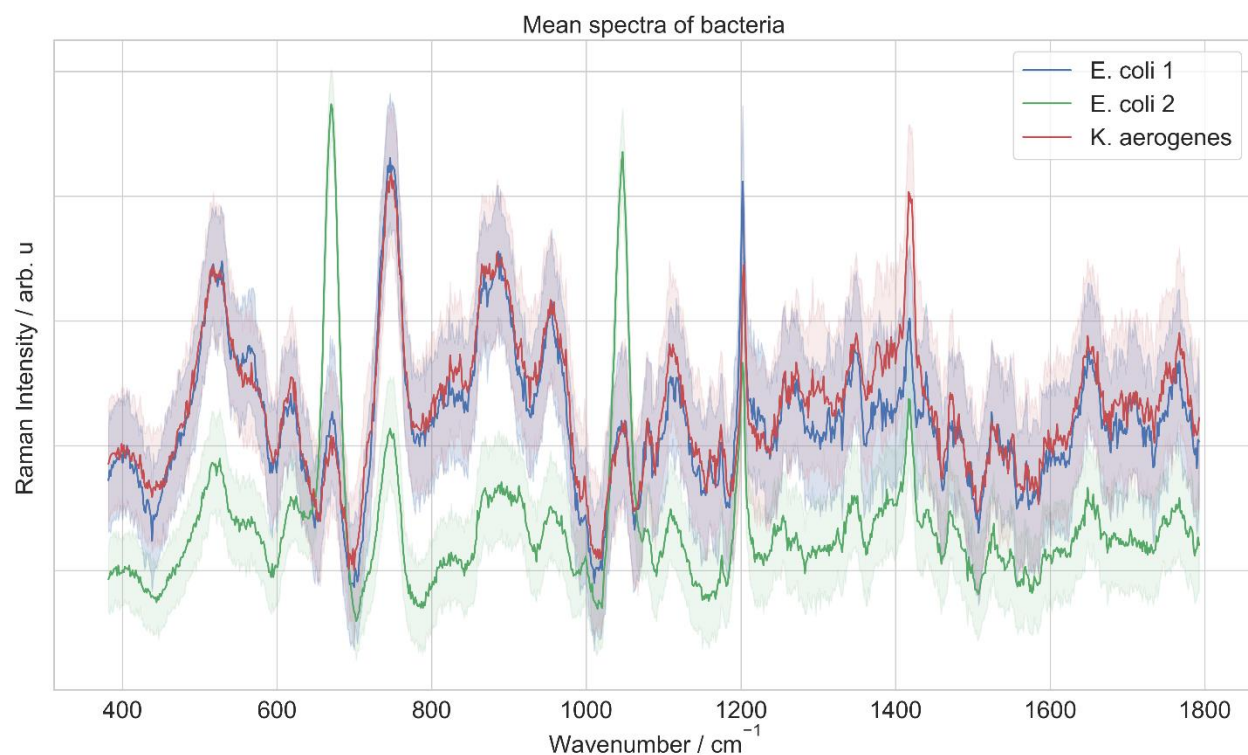

**Figure S3.** Mean spectra and standard deviation from training data for three bacterial strains.

**Table S1.** The species name, figure label, isolate code, and empiric antibiotic treatment. Data sourced from “Rapid identification of pathogenic bacteria using spectroscopy and deep learning”, HO, Chi-Sing, et al. Nature communications, 2019.

| Species                    | Figure label            | Isolate code                 | Empiric antibiotic treatment |
|----------------------------|-------------------------|------------------------------|------------------------------|
| Escherichia coli           | E. coli 1               | ATCC 25922                   | Meropenem                    |
| Escherichia coli           | E. coli 2               | ATCC 700728                  | Meropenem                    |
| Klebsiella pneumoniae      | K. pneumoniae 1         | ATCC 33495                   | Meropenem                    |
| Klebsiella pneumoniae      | K. pneumoniae 2         | Stanford Clinical Collection | Meropenem                    |
| Klebsiella aerogenes       | K. aerogenes            | ATCC 13048                   | Meropenem                    |
| Enterobacter cloacae       | E. cloacae              | ATCC 13047                   | Meropenem                    |
| Proteus mirabilis          | P. mirabilis            | ATCC 43071                   | Meropenem                    |
| Serratia marcescens        | S. marcescens           | ATCC 13880                   | Meropenem                    |
| Pseudomonas aeruginosa     | P. aeruginosa 1         | ATCC 27853                   | Meropenem                    |
| Pseudomonas aeruginosa     | P. aeruginosa 2         | ATCC 9027                    | Meropenem                    |
| Staphylococcus aureus      | MSSA 1                  | ATCC 25923                   | Vancomycin                   |
| Staphylococcus aureus      | MSSA 2                  | ATCC 6538                    | Vancomycin                   |
| Staphylococcus aureus      | MSSA 3                  | ATCC 29213                   | Vancomycin                   |
| Staphylococcus epidermidis | S. epidermidis          | ATCC 12228                   | Vancomycin                   |
| Staphylococcus lugdunensis | S. lugdunensis          | ATCC 49576                   | Vancomycin                   |
| Staphylococcus aureus      | isogenic MSSA USA300-ex |                              | Vancomycin                   |
| Staphylococcus aureus      | MRSA 1 (isogenic)       | USA300-wt                    | Vancomycin                   |
| Staphylococcus aureus      | MRSA 2                  | ATCC 43300                   | Vancomycin                   |

|                                      |                 |             |               |
|--------------------------------------|-----------------|-------------|---------------|
| Streptococcus pneumoniae             | S. pneumoniae 1 | ATCC 49619  | Ceftriaxone   |
| Streptococcus pneumoniae             | S. pneumoniae 2 | ATCC 6305   | Ceftriaxone   |
| Streptococcus pyogenes (Group A)     | Group A Strep.  | ATCC 19615  | Penicillin    |
| Streptococcus agalactiae (Group B)   | Group B Strep.  | ATCC 12386  | Penicillin    |
| Streptococcus dysgalactiae (Group C) | Group C Strep.  | ATCC 12388  | Penicillin    |
| Streptococcus dysgalactiae (Group G) | Group G Strep.  | ATCC 12394  | Penicillin    |
| Streptococcus sanguinis              | S. sanguinis    | ATCC 35571  | Penicillin    |
| Enterococcus faecalis                | E. faecalis 1   | ATCC 29212  | Penicillin    |
| Enterococcus faecalis                | E. faecalis 2   | ATCC 51299  | Penicillin    |
| Enterococcus faecium                 | E. faecium      | ATCC 700221 | Daptomycin    |
| Salmonella enterica                  | S. enterica     | ATCC 13314  | Ciprofloxacin |
| Candida albicans                     | C. albicans     | ATCC 10231  | Caspofungin   |
| Candida glabrata                     | C. glabrata     | ATCC 66032  | Caspofungin   |

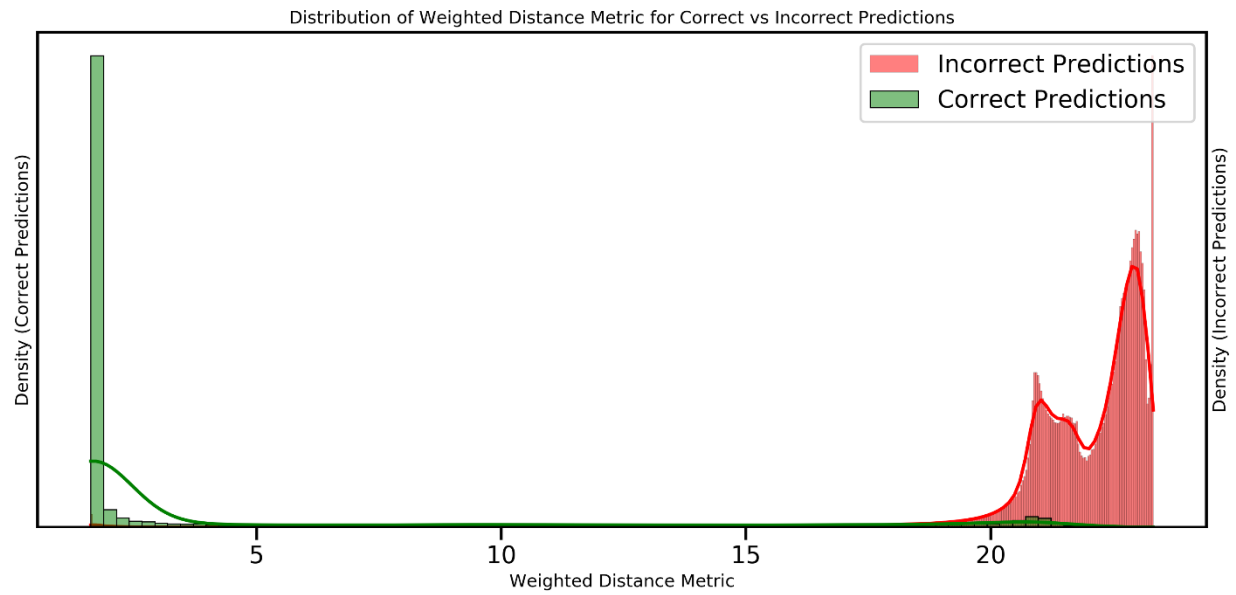

**Figure S4.** Distribution of Weighted Distance Metric for Correct vs Incorrect Predictions. Testing Data Across the 30 Bacteria Strains.

**Table S2.** Confusion matrix of different classification methods for six bacteria species dataset.

|                  | PCA-LDA classification |      |      |      |      |      |
|------------------|------------------------|------|------|------|------|------|
| True\ Predicted  | [1]                    | [2]  | [3]  | [4]  | [5]  | [6]  |
| E. coli [1]      | 4356                   | 100  | 72   | 2624 | 0    | 0    |
| L. innocua [2]   | 76                     | 6313 | 0    | 48   | 28   | 863  |
| P. stutzeri [3]  | 585                    | 1    | 6615 | 15   | 0    | 0    |
| R. terrigena [4] | 2260                   | 452  | 3    | 4565 | 0    | 0    |
| S. cohnii [5]    | 12                     | 223  | 7    | 212  | 6117 | 613  |
| S. warneri [6]   | 19                     | 61   | 6    | 165  | 271  | 6678 |

|                  | PLS-DA classification |      |      |      |      |      |
|------------------|-----------------------|------|------|------|------|------|
| True\ Predicted  | [1]                   | [2]  | [3]  | [4]  | [5]  | [6]  |
| E. coli [1]      | 4466                  | 130  | 128  | 2424 | 4    | 0    |
| L. innocua [2]   | 158                   | 6220 | 5    | 90   | 158  | 697  |
| P. stutzeri [3]  | 414                   | 4    | 6752 | 46   | 0    | 0    |
| R. terrigena [4] | 1832                  | 691  | 5    | 4752 | 0    | 0    |
| S. cohnii [5]    | 44                    | 258  | 4    | 259  | 5721 | 898  |
| S. warneri [6]   | 7                     | 402  | 16   | 153  | 448  | 6174 |

|                  | PCA-SVM classification |      |      |      |      |      |
|------------------|------------------------|------|------|------|------|------|
| True\ Predicted  | [1]                    | [2]  | [3]  | [4]  | [5]  | [6]  |
| E. coli [1]      | 4471                   | 32   | 74   | 2327 | 225  | 23   |
| L. innocua [2]   | 56                     | 6330 | 16   | 46   | 64   | 816  |
| P. stutzeri [3]  | 244                    | 11   | 6934 | 10   | 0    | 17   |
| R. terrigena [4] | 1738                   | 652  | 8    | 4837 | 41   | 4    |
| S. cohnii [5]    | 50                     | 297  | 8    | 53   | 6302 | 474  |
| S. warneri [6]   | 24                     | 766  | 11   | 45   | 258  | 6096 |

|                  | PCA-RF classification |      |      |      |      |      |
|------------------|-----------------------|------|------|------|------|------|
| True\ Predicted  | [1]                   | [2]  | [3]  | [4]  | [5]  | [6]  |
| E. coli [1]      | 4634                  | 74   | 223  | 2202 | 15   | 4    |
| L. innocua [2]   | 80                    | 6186 | 31   | 125  | 142  | 764  |
| P. stutzeri [3]  | 391                   | 13   | 6793 | 15   | 4    | 0    |
| R. terrigena [4] | 2222                  | 801  | 23   | 4211 | 13   | 10   |
| S. cohnii [5]    | 51                    | 261  | 19   | 137  | 6340 | 376  |
| S. warneri [6]   | 30                    | 417  | 1    | 118  | 489  | 6145 |

|                  | Shallow CNN classification |      |      |      |      |      |
|------------------|----------------------------|------|------|------|------|------|
| True\ Predicted  | [1]                        | [2]  | [3]  | [4]  | [5]  | [6]  |
| E. coli [1]      | 5030                       | 58   | 72   | 1981 | 10   | 1    |
| L. innocua [2]   | 45                         | 6306 | 26   | 55   | 131  | 765  |
| P. stutzeri [3]  | 231                        | 21   | 6940 | 20   | 2    | 2    |
| R. terrigena [4] | 1623                       | 498  | 47   | 5073 | 36   | 3    |
| S. cohnii [5]    | 55                         | 247  | 26   | 95   | 6452 | 309  |
| S. warneri [6]   | 24                         | 757  | 12   | 88   | 302  | 6017 |

|                  | Deeper CNN classification |      |      |      |      |      |
|------------------|---------------------------|------|------|------|------|------|
| True\ Predicted  | [1]                       | [2]  | [3]  | [4]  | [5]  | [6]  |
| E. coli [1]      | 5315                      | 57   | 68   | 1642 | 49   | 21   |
| L. innocua [2]   | 92                        | 6262 | 11   | 65   | 105  | 793  |
| P. stutzeri [3]  | 166                       | 12   | 7030 | 6    | 2    | 0    |
| R. terrigena [4] | 1903                      | 375  | 12   | 4887 | 90   | 13   |
| S. cohnii [5]    | 46                        | 141  | 11   | 101  | 6573 | 312  |
| S. warneri [6]   | 14                        | 273  | 1    | 79   | 249  | 6584 |

|                  | Siamese model 2 classification |      |      |      |      |      |
|------------------|--------------------------------|------|------|------|------|------|
| True\ Predicted  | [1]                            | [2]  | [3]  | [4]  | [5]  | [6]  |
| E. coli [1]      | 4892                           | 81   | 63   | 2092 | 5    | 19   |
| L. innocua [2]   | 44                             | 6343 | 20   | 69   | 119  | 733  |
| P. stutzeri [3]  | 303                            | 45   | 6855 | 13   | 0    | 0    |
| R. terrigena [4] | 1518                           | 441  | 13   | 5297 | 11   | 0    |
| S. cohnii [5]    | 12                             | 334  | 9    | 114  | 6418 | 297  |
| S. warneri [6]   | 0                              | 477  | 0    | 59   | 210  | 6454 |
